# Supplementary material for: The limited storage capacity of gonadal adipose tissue directs the development of metabolic disorders in male C57Bl/6J mice
Source: PubMed Central journal article supplement (PMC4473015; doi:10.1007/s00125-015-3594-8), 2015-05-12
Supplement: 125_2015_3594_MOESM8_ESM.pdf [file 125_2015_3594_MOESM8_ESM.pdf]

**ESM Table 2. Body composition and organ weight correlated to body weight of mice on a HFD**

|                                                  | Correlation to body weight - Statistics |            |         |        |                                    |                                |
|--------------------------------------------------|-----------------------------------------|------------|---------|--------|------------------------------------|--------------------------------|
|                                                  | a                                       | b          | c       | r      | P-value <sup>a</sup><br>zero slope | P-value <sup>a</sup><br>linear |
| Lean mass<br>(g; n=36)                           | 2.757                                   | 1.536e-004 | 20.60   | 0.9059 | 2.95E-15***                        | 0.1206                         |
| Fat mass<br>(g; n=36)                            | 0.781                                   | 1.738      | 25.48   | 0.9517 | 7.75E-24***                        | 0.1782                         |
| Liver weight<br>(g; n=43)                        | 5.123                                   | 3.160e-009 | 1.180   | 0.9424 | 3.94E-17***                        | 3.12E-06***                    |
| Heart weight<br>(g; n=26)                        | 6.893                                   | 6.024e-014 | 0.1633  | 0.5734 | 2.70E-03**                         | 0.1728                         |
| Spleen weight<br>(g; n=35)                       | 1                                       | 1.786e-003 | 0.0237  | 0.7271 | 5.07E-07***                        | 1.000                          |
| BAT weight<br>(g; 36)                            | 1                                       | 0.01254    | 0.2645  | 0.9289 | 6.24E-16***                        | 1.000                          |
| Gonadal FP<br>weight <sup>b</sup> (g; n=54)      | 0.320                                   | 0.4411     | 26.21   | 0.7254 | 3.18E-11***                        | 7.73E-04***                    |
| Subcutaneous FP<br>weight <sup>b</sup> (g; n=54) | 1                                       | 0.04113    | -0.9205 | 0.9607 | 4.20E-26***                        | 0.1620                         |
| Mesenteric FP<br>weight (g; n=54)                | 1                                       | 0.0474     | -1.084  | 0.8765 | 2.36E-20***                        | 0.7785                         |

Linear correlation: a=1; equation:  $y=b \times x+c$

Non-linear power function with y-intercept: a>1; equation:  $y=b \times x^a+c$

Non-linear power function with x-intercept: a<1 ; equation:  $y=b \times (x-c)^a$

x=body weight; y=lean, fat or individual organ mass.

<sup>a</sup>p-value after bonferroni multiple test correction

<sup>b</sup>for gonadal and subcutaneous fat pad (FP) weight one of the two pads was used for calculations
