# Supplementary material for: The limited storage capacity of gonadal adipose tissue directs the development of metabolic disorders in male C57Bl/6J mice
Source: PubMed Central journal article supplement (PMC4473015; doi:10.1007/s00125-015-3594-8), 2015-05-12
Supplement: 125_2015_3594_MOESM10_ESM.pdf [file 125_2015_3594_MOESM10_ESM.pdf]

**ESM Table 4. Composition and comparison of WAT depots from obese mice**

|                                                      | Mouse WAT       |                 |                 | Statistics <sup>a</sup>   |                           |                           |
|------------------------------------------------------|-----------------|-----------------|-----------------|---------------------------|---------------------------|---------------------------|
|                                                      | gWAT<br>(n=8)   | sWAT<br>(n=8)   | mWAT<br>(n=8)   | T-test<br>gWAT vs<br>sWAT | T-test<br>gWAT vs<br>mWAT | T-test<br>sWAT vs<br>mWAT |
| <b>Adipocyte size<br/>(<math>\mu\text{m}</math>)</b> | 124.4 $\pm$ 8.0 | 112.0 $\pm$ 2.5 | 113.9 $\pm$ 5.5 | 0.0072**                  | 0.0696                    | 1.000                     |
| <b>Adipocyte no/FP<br/>(*10<sup>6</sup>)</b>         | 2.10 $\pm$ 0.36 | 3.02 $\pm$ 0.47 | 3.41 $\pm$ 0.84 | 0.0048**                  | 0.0096**                  | 1.000                     |
| <b>SVF nr/FP<br/>(*10<sup>6</sup>)</b>               | 1.67 $\pm$ 0.45 | 0.75 $\pm$ 0.26 | 2.79 $\pm$ 1.78 | 0.0016**                  | 0.8328                    | 0.0504                    |
| <b>Leukocytes<br/>(% CD45 of SVF)</b>                | 63.1 $\pm$ 7.9  | 67.0 $\pm$ 3.5  | 67.9 $\pm$ 16.4 | 1.000                     | 1.000                     | 1.000                     |
| <b>T lymphocytes<br/>(% CD3 of SVF)</b>              | 6.6 $\pm$ 2.0   | 12.5 $\pm$ 4.2  | 11.3 $\pm$ 9.4  | 0.0368*                   | 1.000                     | 1.000                     |
| <b>T lymphocyte<br/>ratio (CD4:CD8)</b>              | 1.15 $\pm$ 0.47 | 1.00 $\pm$ 0.24 | 1.77 $\pm$ 0.56 | 1.000                     | 0.3376                    | 0.0280*                   |
| <b>B lymphocytes<br/>(% CD19 of SVF)</b>             | 2.1 $\pm$ 1.2   | 13.0 $\pm$ 10.2 | 19.3 $\pm$ 21.2 | 0.1224                    | 0.4192                    | 1.000                     |
| <b>Macrophages<br/>(% F4/80 of SVF)</b>              | 37.5 $\pm$ 3.9  | 6.5 $\pm$ 1.8   | 17.9 $\pm$ 10.5 | 7.69E-11***               | 0.0032**                  | 0.0792                    |

<sup>a</sup> $p$ -value after bonferroni multiple test correction
